# Supplementary material
Source: publisher figshare collection journal article supplement (https://asha.figshare.com/articles/dataset/_/14348060)
Supplement: Supplementary file 1 [file 1]

## Supplemental Material S2. Italian 28-word inconsistency task based on DEAP Inconsistency subtest.

### VALUTAZIONE INCONSISTENZA

Istruzioni: "Che cos'è questo?" annota ogni aiuto dato al bambino: DS = duplice scelta I = imitazione

Punteggio: Registra le risposte del bambino con 0 = se le risposte sono tutte le stesse ; 1 = se le risposte sono diverse

| Target          | IPA             | Prova 1 | Prova 2 | Prova 3 | Punteggio |
|-----------------|-----------------|---------|---------|---------|-----------|
| 1 Cucchiaino    | kuk:ja'i:no     |         |         |         |           |
| 2 Ragnatela     | raɲa'te:la      |         |         |         |           |
| 3 Rinoceronte   | rinotʃe'ronte   |         |         |         |           |
| 4 Ippopotamo    | ip:opotamo      |         |         |         |           |
| 5 Camaleonte    | kamale'o:nte    |         |         |         |           |
| 6 Barbapapà     | barbapa'pa      |         |         |         |           |
| 7 Aspirapolvere | aspira'po:lvere |         |         |         |           |
| 8 Scivolano     | 'ʃi:volano      |         |         |         |           |
| 9 Elicottero    | eli'co:t:ero    |         |         |         |           |
| 10 Dinosaurio   | dino'sa:uro     |         |         |         |           |
| 11 Elefante     | ele'fa:nte      |         |         |         |           |
| 12 Scoiattolo   | sco'jat:olo     |         |         |         |           |
| 13 Frigorifero  | frigo'ri:fero   |         |         |         |           |
| 14 Canguro      | kan'gu:ro       |         |         |         |           |
| 15 Bicicletta   | bitʃi'cle:t:a   |         |         |         |           |
| 16 Semaforo     | se'ma:foro      |         |         |         |           |
| 17 Aeroplano    | aero'pla:no     |         |         |         |           |
| 18 Telefono     | tele'fo:no      |         |         |         |           |
| 19 Arcobaleno   | arcoba'le:no    |         |         |         |           |
| 20 Televisione  | tele'vi:sjone   |         |         |         |           |
| 21 Orologio     | oro'lo:dʒo      |         |         |         |           |
| 22 Cioccolato   | tʃo'k:olato     |         |         |         |           |
| 23 Asciugamano  | aʃuga'ma:no     |         |         |         |           |
| 24 Coccinella   | cot:ʃinel:a     |         |         |         |           |
| 25 Ombrello     | om'bre:l:o      |         |         |         |           |
| 26 Tiramisù     | tirami'su       |         |         |         |           |
| 27 Maschera     | ma'ske:ra       |         |         |         |           |
| 28 Spazzolino   | spa't:solino    |         |         |         |           |

Punteggio inconsistenza = ( punteggio tot. / numero tot parole) x 100. Un punteggio totale di 10 o più ( 40%) è considerato inconsistente.
