# Supplementary material
Source: publisher figshare collection journal article supplement (https://asha.figshare.com/articles/dataset/_/14348060)
Supplement: Supplementary file 2 [file 1]

**Supplemental Material S1.** Word list of 52 Italian polysyllabic words based on an Australian English word list.

**TEST PAROLE POLISILLABICHE**

| SLIDE | PAROLA        | TARGET ADULTO  | ACCENTO<br>T = Tonico<br>A = Atono | TRANSCRIZIONE PRODUZIONE BAMBINO | AIUTO(I/DS) | PROSODIA | FLUIDITA' |
|-------|---------------|----------------|------------------------------------|----------------------------------|-------------|----------|-----------|
| 1     | TAMBURO       | tam'bu:ro      | aTa                                |                                  |             |          |           |
| 2     | SCHELETRO     | 'ske:letro     | Taa                                |                                  |             |          |           |
| 3     | SEMAFORO      | se'ma:foro     | aTaa                               |                                  |             |          |           |
| 4     | TARTARUGA     | tarta'ru:ga    | aaTa                               |                                  |             |          |           |
| 5     | OMBRELLO      | om'bre:l:o     | aTa                                |                                  |             |          |           |
| 6     | DONDOLANO     | 'do:ndolano    | Taaa                               |                                  |             |          |           |
| 7     | FRAGOLA       | 'fragola       | Taa                                |                                  |             |          |           |
| 8     | BICICLETTA    | bit:ʃi'cle:t:a | aaTa                               |                                  |             |          |           |
| 9     | MASCHERA      | 'ma:skera      | Taa                                |                                  |             |          |           |
| 10    | ZANZARA       | dzan'dza:ra    | aTa                                |                                  |             |          |           |
| 11    | SCIVOLANO     | 'ʃi:volano     | Taaa                               |                                  |             |          |           |
| 12    | TELEFONO      | te'le:fono     | aTaa                               |                                  |             |          |           |
| 13    | LUCERTOLA     | lu'tʃe:rtola   | aTaa                               |                                  |             |          |           |
| 14    | DINOSAURO     | dino'sa:uro    | aaTa                               |                                  |             |          |           |
| 15    | ASPIRAPOLVERE | aspira'polvere | aaaTaa                             |                                  |             |          |           |
| 16    | BARBAPAPA'    | barbapa'pa     | aaaT                               |                                  |             |          |           |
| 17    | PINOCCHIO     | pi'no:k:jo     | aTaa                               |                                  |             |          |           |
| 18    | BANANA        | ba'na:na       | aTa                                |                                  |             |          |           |
| 19    | CINEMA        | 'tʃi:nema      | Taa                                |                                  |             |          |           |
| 20    | COCCODRILLO   | kok:o'dril:o   | aaTa                               |                                  |             |          |           |
| 21    | TIRAMISU'     | tirami'su      | aaaT                               |                                  |             |          |           |
| 22    | CUCCHIAINO    | kuk:ja'ino     | aaTa                               |                                  |             |          |           |

I = Imitazione      DS = Duplice Scelta

| SLIDE | PAROLA      | TARGET ADULTO | ACCENTO<br>T = Tonico<br>A = Atono | TRANSCRIZIONE PRODUZIONE BAMBINO | AIUTO(I/DS) | PROSODIA | FLUIDITA' |
|-------|-------------|---------------|------------------------------------|----------------------------------|-------------|----------|-----------|
| 23    | POMODORO    | pomo'do:ro    | aaTa                               |                                  |             |          |           |
| 24    | PENTOLA     | 'pentola      | Taa                                |                                  |             |          |           |
| 25    | BANDIERA    | ban'djera     | aTa                                |                                  |             |          |           |
| 26    | FARFALLE    | far'fa:l:e    | aTa                                |                                  |             |          |           |
| 27    | SANDALI     | 'sa:ndali     | Taa                                |                                  |             |          |           |
| 28    | BISCOTTI    | bi'sko:t:i    | aTa                                |                                  |             |          |           |
| 29    | CIOCCOLATA  | tʃok:o'la:ta  | aaTa                               |                                  |             |          |           |
| 30    | CANGURO     | kan'gu:ro     | aTa                                |                                  |             |          |           |
| 31    | ELEFANTE    | ele'fa:nte    | aaTaa                              |                                  |             |          |           |
| 32    | SUONANO     | 'swɔ:nano     | Taa                                |                                  |             |          |           |
| 33    | OSPEDALE    | ospe'da:le    | aaTa                               |                                  |             |          |           |
| 34    | VULCANO     | vul'kano      | aTa                                |                                  |             |          |           |
| 35    | PIANOFORTE  | pjano'fo:rte  | aaTa                               |                                  |             |          |           |
| 36    | AEREO       | a'e:reo       | aTaa                               |                                  |             |          |           |
| 37    | RAGNATELA   | raj:a'te:la:  | aaTa                               |                                  |             |          |           |
| 38    | FRIGORIFERO | frigo'ri:fero | aaTaa                              |                                  |             |          |           |
| 39    | ARCOBALENO  | arcoba'le:no  | aaaTa                              |                                  |             |          |           |
| 40    | ASCIUGAMANO | aʃ:uga'ma:no  | aaaTa                              |                                  |             |          |           |
| 41    | SPAZZOLINO  | spaz:o'li:no  | aaTa                               |                                  |             |          |           |
| 42    | TELEVISIONE | televi'sjo:ne | aaaTa                              |                                  |             |          |           |
| 43    | GELATO      | dʒe'la:to     | aTa                                |                                  |             |          |           |
| 44    | SERPENTE    | ser'pe:nte    | aTa                                |                                  |             |          |           |
| 45    | POLIZIOTTO  | poli'zjo:t:o  | aaTa                               |                                  |             |          |           |
| 46    | ELICOTTERO  | eli'ko:t:ero  | aaTaa                              |                                  |             |          |           |
| 47    | PINGUINO    | pin'gwino     | aTa                                |                                  |             |          |           |
| 48    | CONCHIGLIA  | kon'ki ʎa     | aTa                                |                                  |             |          |           |

| SLIDE | PAROLA     | TARGET ADULTO | ACCENTO<br>T = Tonico<br>A = Atono | TRANSCRIZIONE PRODUZIONE BAMBINO | AIUTO(I/DS) | PROSODIA | FLUIDITA' |
|-------|------------|---------------|------------------------------------|----------------------------------|-------------|----------|-----------|
| 49    | OROLOGIO   | oro'lo:dʒo    | aaTa                               |                                  |             |          |           |
| 50    | IPPOPOTAMO | ip:o'po:tamo  | aaTaa                              |                                  |             |          |           |
| 51    | ASTRONAUTA | astro'na:uta  | aaTa                               |                                  |             |          |           |
| 52    | PAGLIACCIO | pa'ʎa:t:ʃo    | aTa                                |                                  |             |          |           |
